# Supplementary material for: Physiological Costs of Repetitive Courtship Displays in Cockroaches Handicap Locomotor Performance
Source: PLoS One. 2015 Nov 25;10(11):e0143664. doi: 10.1371/journal.pone.0143664 (PMC4659605; doi:10.1371/journal.pone.0143664)
Supplement: S1 File — (XLS) [file pone.0143664.s001.xls]

## Sheet: Courtship trials
Male no	Trial type	Body length (cm)	mean wing length	weight (g)	N Full raises	Duration Full raises	Distance covered (m)	Max speed (cm/s)
1	Display	4.2	3.4	1.41	0	0	25.367	13.73
2	Control	4.3	3.3	1.59			44.776	21.558
3	Display	4	3.25	1.24	0	0	26.857	15.366
4	Control	4.2	3.3	1.75			55.745	25.61
6	Control	3.9	3.4	1.4			35.568	20.23
7	Display	4.1	3.3	1.47	0	0	30.332	15.333
8	Control	4	3.3	1.31			30.648	17.361
9	Display	4.3	3.3	1.67	1	2.047	28.391	13.399
10	Control	4.1	3.3	1.66			47.891	30.473
11	Display	3.9	3.2	1.33	6	16.233	18.145	9.566
12	Control	4	3.3	1.45			62.651	31.264
13	Display	4.2	3.3	1.69	0	0	35.343	17.154
14	Control	3.8	3.1	1.17			22.478	9.553
15	Display	4.3	3.4	1.57	21	41.986	32.544	16.641
16	Control	4.1	3.3	1.44			49.29	23.993
17	Display	4	3.3	1.03	0	0	36.426	21.055
18	Control	3.9	3.25	1.34			35.794	16.795
19	Display	4.2	3.25	1.42	0	0	34.034	17.965
20	Control	4	3.2	1.28			22.253	13.862
21	Display	4.2	3.4	1.32	0	0	19.68	11.63
22	Control	3.9	3.05	1.3			34.124	19.259
23	Display	3.8	3.2	1.3	1	2.687	31.551	14.329
24	Control	4	3.3	1.24			53.398	24.154
25	Display	4	3.3	1.33	0	0	40.263	17.965
26	Control	3.8	3.15	1.41			41.391	23.448
27	Display	3.9	3.2	1.31	3	3.609	36.336	16.718
28	Control	3.9	3.35	1.29			47.259	21.623
29	Display	4.3	3.35	1.58	9	14.421	38.096	16.376
30	Control	4	3.2	1.41			62.29	29.121
31	Display	3.6	2.95	1.42	1	0.687	40.488	21.688
32	Control	3.7	2.95	1.29			41.391	17.921
33	Display	3.6	2.85	1.16	26	58.379	30.648	15.907
34	Control	3.7	2.9	1.19			43.603	23.297
35	Display	4	3.2	1.49	17	47.473	40.218	18.71
36	Control	4.1	3.3	1.2			71.769	30.732
37	Display	3.7	2.9	1.24	0	0	33.086	17.114
38	Control	4	3	1.18			39.27	20.933
39	Display	3.9	3.25	1.44	22	74.937	37.645	20.933
40	Control	4.2	3.3	1.46			47.665	23.372
41	Display	3.6	2.95	1.33	2	22.157	32.318	15.465
42	Control	3.7	2.65	1.26			30.739	15.498
43	Display	3.9	3.15	1.39	17	57.376	23.11	12.896
44	Control	4	3.3	1.08			36.516	20.753
45	Display	3.6	2.7	1.24	0	0	35.749	15.046
47	Display	4	3.25	1.36	7	10.969	41.933	18.807
48	Control	3.9	3.2	1.56			42.655	21.885
49	Display	4	3.2	1.43	0	0	26.992	14.709
50	Control	3.5	2.8	1.11			38.728	18.566
51	Display	4.1	3.3	1.18	18	23.248	35.659	15.873
52	Control	3.9	3.2	1.3			63.599	28.545

## Sheet: Mate choice trials
Male no	Trial type	Body length (cm)	mean wing length	weight (g)	Proportion full wing raises	Mated?
1	Display	4.2	3.4	1.41	0	No
3	Display	4	3.25	1.24	0.331	Yes
4	Control	4.2	3.3	1.75	0.2906	Yes
6	Control	3.9	3.4	1.4	0.2762	No
7	Display	4.1	3.3	1.47	0.1202	Yes
8	Control	4	3.3	1.31	0.2756	Yes
9	Display	4.3	3.3	1.67	0.0068	No
10	Control	4.1	3.3	1.66	0.0121	No
11	Display	3.9	3.2	1.33	0.2043	Yes
12	Control	4	3.3	1.45	0.2371	Yes
13	Display	4.2	3.3	1.69	0	No
14	Control	3.8	3.1	1.17	0.1204	No
15	Display	4.3	3.4	1.57	0.0666	Yes
16	Control	4.1	3.3	1.44	0.4091	Yes
17	Display	4	3.3	1.03	0.0153	No
18	Control	3.9	3.25	1.34	0.1617	Yes
49	Display	4	3.2	1.43	0.0027	No
50	Control	3.5	2.8	1.11	0.0512	Yes
51	Display	4.1	3.3	1.18	0.1331	Yes
52	Control	3.9	3.2	1.3	0.0119	Yes
